# Supplementary material for: Comparative transcriptomics reveals the mechanism of antibacterial activity of fruit-derived dihydrochalcone flavonoids against Porphyromonas gingivalis
Source: Royal Society of Chemistry journal article supplement (doi:10.1039/d4fo02854f), 2024-01-01
Supplement: d4fo02854f1.pdf [file d4fo02854f1.pdf]

## Electronic supplementary information

# Comparative transcriptomics reveals the mechanism of antibacterial activity of fruit-derived dihydrochalcone against *Porphyromonas gingivalis*

Desheng Wu <sup>a</sup>, Lisha Hao <sup>a</sup>, Xiaohan Liu <sup>a</sup>, Xiaofeng Li <sup>a\*</sup>, Guanglei Zhao <sup>b\*\*</sup>

<sup>a</sup> School of Food Science and Engineering, South China University of Technology, Wushan Road 381,

Guangzhou, Guangdong, 510640, China

<sup>b</sup> State Key Laboratory of Pulp and Paper Engineering, South China University of Technology, Guangzhou, Guangdong, 510641, China

Corresponding authors :

\*Dr. Xiaofeng Li,

\*\*Dr. Guanglei Zhao

School of Food Science and Engineering,

South China University of Technology,

Wushan Road 381, Guangzhou, Guangdong, 510640, China.

Tel: +86-20-2223-6819.

Fax: +86-20-8711-2853.

E-mail: xflibio@scut.edu.cn; glzhao@scut.edu.cn

Table S1. Genome mapping statistics

| Sample      | Total Reads | Unmapped Reads | Unique Reads    | Mapped | Multiple reads | Mapped | Mapping Ratio |
|-------------|-------------|----------------|-----------------|--------|----------------|--------|---------------|
| Blank1      | 6840522     | 82807(1.21%)   | 6475870(94.67%) |        | 281845(4.12%)  |        | 98.79%        |
| Blank2      | 6579550     | 90733(1.38%)   | 6235356(94.77%) |        | 253461(3.85%)  |        | 98.62%        |
| Phlorizin1  | 6467260     | 100719(1.56%)  | 6165198(95.33%) |        | 201343(3.11%)  |        | 98.44%        |
| Phlorizin2  | 7202516     | 89286(1.24%)   | 6876416(95.47%) |        | 236814(3.29%)  |        | 98.76%        |
| Naringenin1 | 7173432     | 95787(1.34%)   | 6851267(95.51%) |        | 226378(3.16%)  |        | 98.66%        |
| Naringenin2 | 6451988     | 107465(1.67%)  | 6136792(95.11%) |        | 207731(3.22%)  |        | 98.33%        |
| Phloretin1  | 6125130     | 95122(1.55%)   | 5855034(95.59%) |        | 174974(2.86%)  |        | 98.45%        |
| Phloretin2  | 6026522     | 108180(1.80%)  | 5753859(95.48%) |        | 164483(2.73%)  |        | 98.20%        |

Table S2. Statistics on the number of genes detected in the samples

| Sample Name             | Known Gene Num | Group Name                            | Known Gene Num |
|-------------------------|----------------|---------------------------------------|----------------|
| Blank1                  | 1829 (95.76%)  | Blank                                 | 1851 (96.91%)  |
| Blank2                  | 1837 (96.18%)  |                                       |                |
| Phlorizin1              | 1830 (95.81%)  | Naringenin                            | 1852 (96.96%)  |
| Phlorizin2              | 1841 (96.39%)  |                                       |                |
| Naringenin1             | 1839 (96.28%)  | Phloretin                             | 1842 (96.44%)  |
| Naringenin2             | 1823 (95.45%)  |                                       |                |
| Phloretin1              | 1824 (95.50%)  | Phlorizin                             | 1855 (97.12%)  |
| Phloretin2              | 1827 (95.65%)  |                                       |                |
| Reference Genes<br>1910 |                | All Known Gene Num<br>1875 ( 98.17% ) |                |

Table S3. Gene coverage statistics

| Coverage range | Blank1 (%)    | Blank2 (%)    | Naringenin1 (%) | Naringenin2 (%) | Phloretin1 (%) | Phloretin2 (%) | Phlorizin1 (%) | Phlorizin2 (%) |
|----------------|---------------|---------------|-----------------|-----------------|----------------|----------------|----------------|----------------|
| 00-20%         | 0 (0.0%)      | 2 (0.1085%)   | 1 (0.054%)      | 5 (0.2722%)     | 3 (0.1635%)    | 8 (0.4348%)    | 1 (0.05444%)   | 1 (0.05408%)   |
| 20-40%         | 10 (0.5438%)  | 13 (0.705%)   | 10 (0.54%)      | 8 (0.4355%)     | 12 (0.654%)    | 8 (0.4348%)    | 9 (0.4899%)    | 6 (0.3245%)    |
| 40-60%         | 30 (1.631%)   | 18 (0.9761%)  | 29 (1.566%)     | 21 (1.143%)     | 33 (1.798%)    | 32 (1.739%)    | 21 (1.143%)    | 20 (1.082%)    |
| 60-80%         | 51 (2.773%)   | 40 (2.169%)   | 51 (2.754%)     | 45 (2.45%)      | 32 (1.744%)    | 45 (2.446%)    | 41 (2.232%)    | 45 (2.434%)    |
| 80-100%        | 1748 (95.05%) | 1771 (96.04%) | 1761 (95.09%)   | 1758 (95.7%)    | 1755 (95.64%)  | 1747 (94.95%)  | 1765 (96.08%)  | 1777 (96.11%)  |

Table S4. The results of RNA-seq and qPCR of the treatment group.

| Gene\Group | Blank vs Phlorizin |      | Blank vs Naringenin |      | Blank vs Phloretin |      |
|------------|--------------------|------|---------------------|------|--------------------|------|
|            | RNA-seq            | QPCR | RNA-seq             | QPCR | RNA-seq            | QPCR |
| AhpC       | 0.51               | 0.38 | 0.38                | 0.33 | 0.33               | 0.33 |
| FabF       | 0.97               | 1.16 | 1.22                | 1.39 | 2.20               | 3.12 |
| HagA       | 0.60               | 0.78 | 0.60                | 0.78 | 0.40               | 0.80 |
| PG_RS01230 | 2.60               | 2.75 | 2.04                | 1.74 | 1.41               | 1.52 |
| PG_RS06630 | 0.73               | 0.82 | 0.47                | 0.55 | 0.28               | 0.31 |
| RibH       | 0.62               | 0.56 | 0.60                | 0.55 | 0.38               | 0.41 |
| RplX       | 0.56               | 0.60 | 0.47                | 0.55 | 0.54               | 0.80 |
| Tpx        | 3.86               | 3.81 | 3.15                | 3.62 | 3.34               | 3.89 |
| trxA       | 3.79               | 2.84 | 4.69                | 3.68 | 5.48               | 6.62 |

The RNA-seq results calculated as FPKM and qPCR results calculated as  $\log_2$ FC.

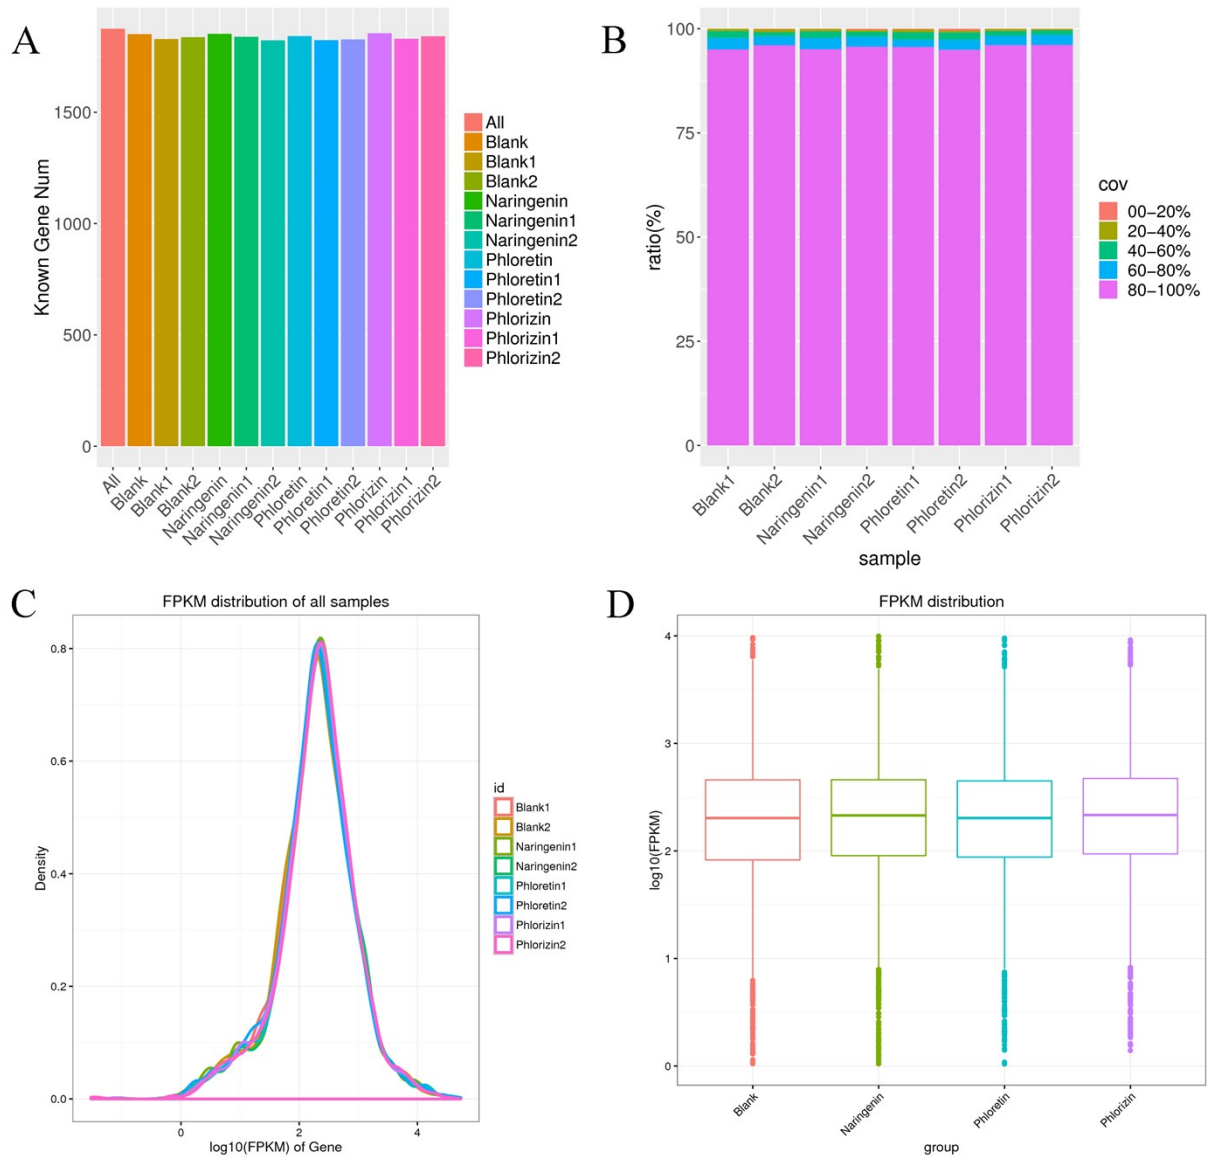

Fig. S1 Statistics on comparison between sequencing results and reference genome and comparison between groups, including statistics on the number of known genes (A), gene coverage distribution (B), sample expression abundance distribution (C) and comparison of expression levels between groups (D).

# Significant Differential Gene Heatmap

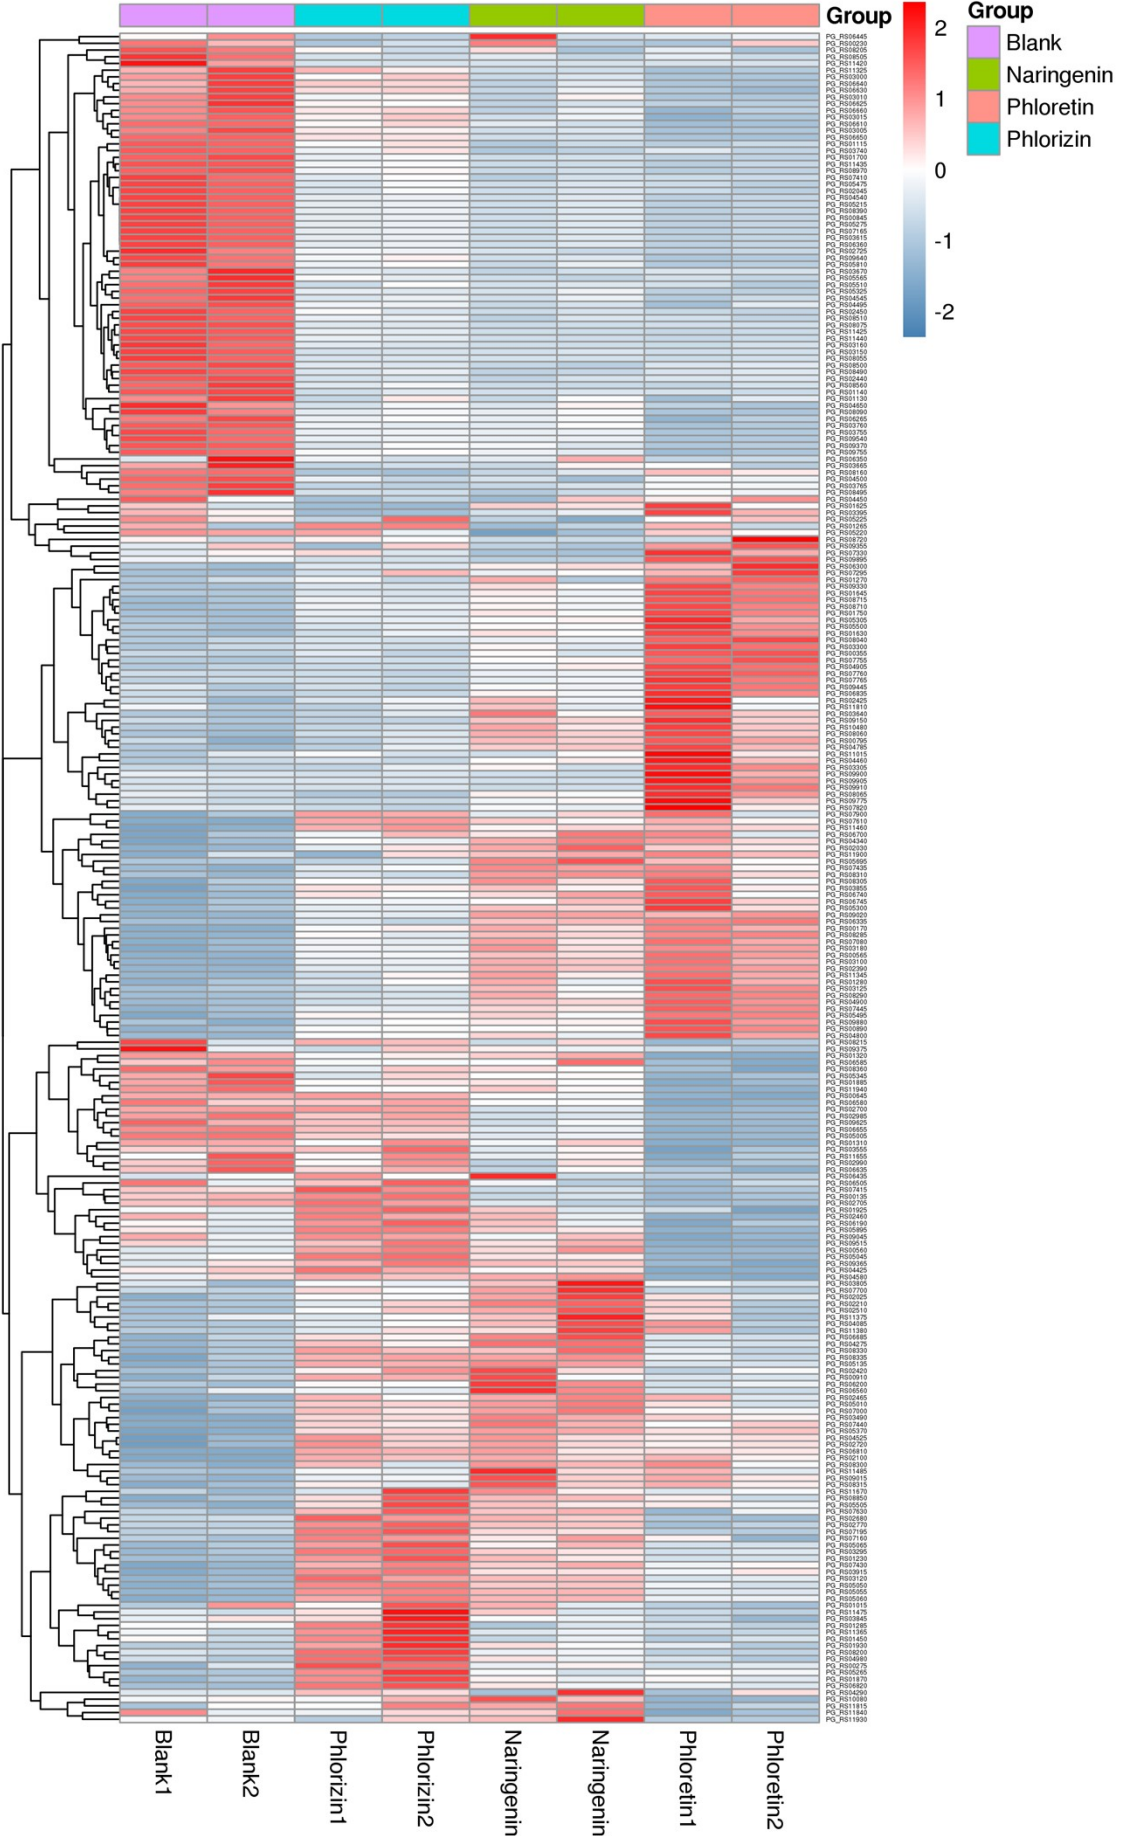

Fig. S2 Cluster diagram of differential expression patterns between groups.
